# Supplementary material for: Microbial Degradation of Different Hydrocarbon Fuels with Mycoremediation of Volatiles
Source: PubMed Central journal article supplement (PMC7074729; doi:10.3390/microorganisms8020163), 2020-01-23
Supplement: microorganisms-08-00163-s001.pdf [file microorganisms-08-00163-s001.pdf]

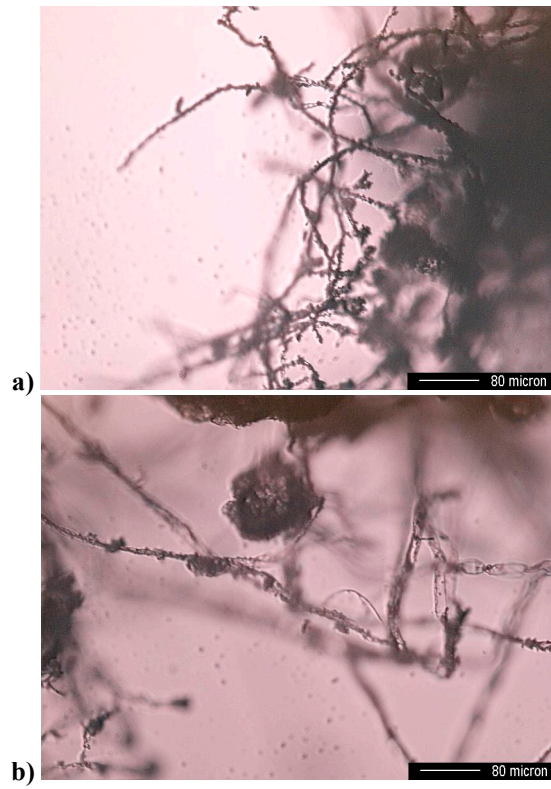

**Figure S1.** Microscopic pictures of a) fungal mycelium and b) *Trichoderma* sp. collected from fish biodiesel contaminated soil samples.

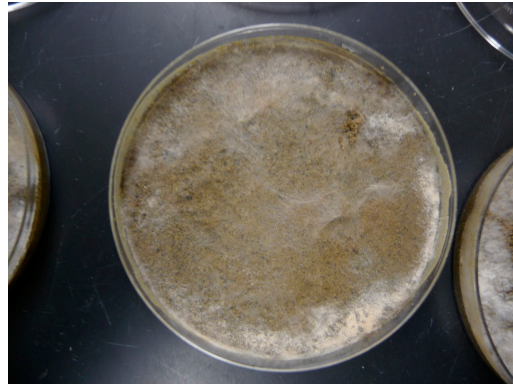

**Figure S2.** Fungal growth on fish biodiesel contaminated soil sample.
